# Supplementary material for: Observational Study of the Association between Hyponatremia and Rhabdomyolysis in Patients Presenting to Hospital
Source: MDPI journal article supplement (doi:10.3390/jcm11113215), 2022-06-05
Supplement: s1 [file s1]

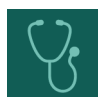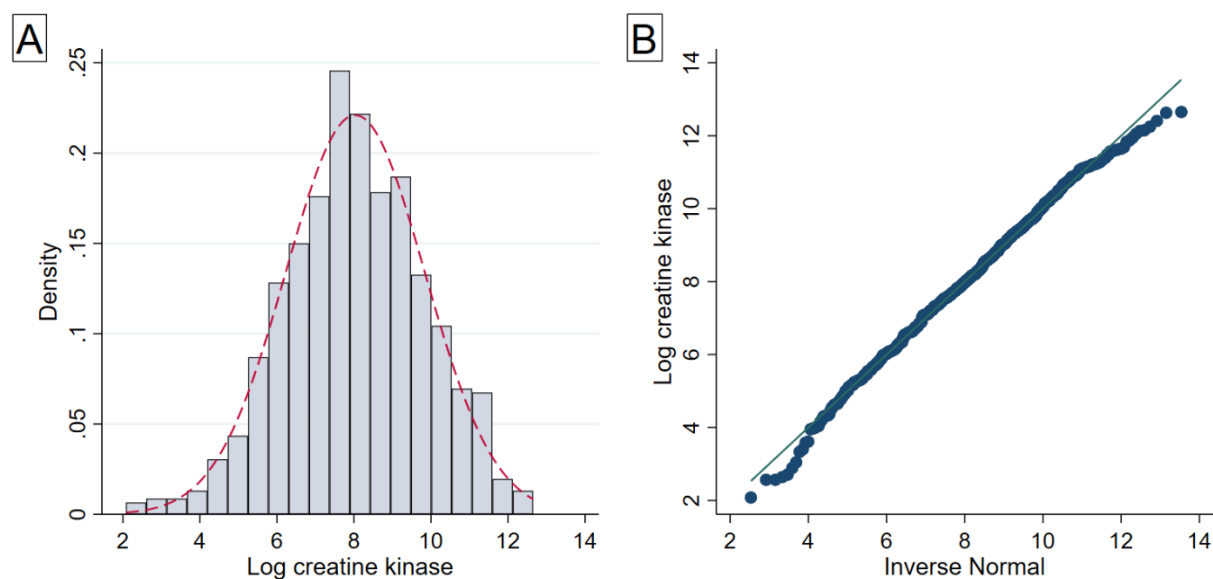

**Figure S1.** Outcome of logarithmic transformation of peak serum creatine kinase. (A) Histogram of the log transformed creatine kinase values with superimposed normal distribution curve. (B) Normality probability plot (Q-Q plot) showed a good outcome of the transformation.
