# Supplementary material for: Observational Study of the Association between Hyponatremia and Rhabdomyolysis in Patients Presenting to Hospital
Source: MDPI journal article supplement (doi:10.3390/jcm11113215), 2022-06-05
Supplement: s1 [file s1]

**Table S1.** Description of rhabdomyolysis categories and examples used in the context of the observational study by Lim et al.

| Category           | Description                                                                                          | Examples                                                                                                                                             |
|--------------------|------------------------------------------------------------------------------------------------------|------------------------------------------------------------------------------------------------------------------------------------------------------|
| Trauma             | Direct muscle injury to specific muscle group(s).                                                    | Crush injury, motor vehicle accident, fall from above ground height with significant injuries, physical assault or restrain.                         |
| Ischemia           | Loss or severely reduced blood supply.                                                               | Limb arterial occlusion or embolism due to peripheral vascular disease or atrial fibrillation.                                                       |
| Pressure           | Nontraumatic prolonged immobilization, usually in recumbent position.                                | Prolonged lie on the floor or confined space following syncope, reduced conscious state, debility, or ground-level fall.                             |
| Exertional         | Extreme physical exertion or exercise, excluding seizures.                                           | Marathon, weightlifting, spin class, skiing, cycling, psychotic motor agitation.                                                                     |
| Seizures           | Prolonged convulsions with motor manifestations.                                                     | Recurrent or prolonged tonic-clonic or clonic seizures, or status epilepticus.                                                                       |
| Infection          | Viral and bacterial infections.                                                                      | Influenza A and B, herpes simplex, mycoplasma pneumoniae, legionella, streptococcal or staphylococcal toxic shock syndrome (list is not exhaustive). |
| Drugs & toxins     | Prescribed or illicit drugs known to be linked with rhabdomyolysis, toxin exposure, or envenomation. | Statins, heroin, methamphetamine, neuroleptic malignant syndrome with psychotropics, snake bite, alcohol poisoning.                                  |
| Inflammatory       | Inflammatory myopathies.                                                                             | Polymyositis, dermatomyositis, inclusion body myositis, autoimmune disease-related myositis, paraneoplastic phenomenon.                              |
| Electrolytes       | Severe electrolyte disorder other than hyponatremia (main exposure variable in this study).          | Potassium < 2.5 mmol/L, phosphate < 0.40 mmol/L, magnesium < 0.40 mmol/L.                                                                            |
| Thermal extreme    | Body temperature >40.5°C, or <32°C, measured by first responders or in Emergency.                    | Environmental or excessive heat generation, such heat stroke, malignant hyperthermia. Prolonged cold exposure, near-drowning.                        |
| Inherited/familial | Known diagnosis of genetic or inherited disease predisposing to muscle breakdown.                    | Metabolic myopathies, inborn errors of metabolism, mitochondrial disease.                                                                            |
